# Supplementary material for: Fatty Acid Amide Hydrolase Deficiency Is Associated with Deleterious Cardiac Effects after Myocardial Ischemia and Reperfusion in Mice
Source: MDPI journal article supplement (doi:10.3390/ijms232012690), 2022-10-21
Supplement: s1 [file s1]

**Figure S1.** The gating strategy for flow cytometry. (a) This analysis was performed as illustrated for myocardium. We defined the immune cells using CD45 staining versus forward scatter area. (b) The CD45<sup>+</sup> immune cells were further classified by Hoechst staining to differentiate living and (c) dead cells. (d) Next, we differentiated CD4<sup>+</sup> and (e) CD8<sup>+</sup> T cells and discriminated apoptosis according to Annexin V fluorescence. APC-A, allophycocyanin area; FITC-A, Fluorescein isothiocyanate area; FSC-A, forward scatter area.
